# Supplementary material for: B–Hb⋯π interaction in heteroaromatics and anionic arenes: a DFT study
Source: Royal Society of Chemistry journal article supplement (doi:10.1039/d3nj01797d), 2023-01-01
Supplement: d3nj01797d1.pdf [file d3nj01797d1.pdf]

**Electronic Supplementary Information (ID: NJ-ART-04-2023-001797)**

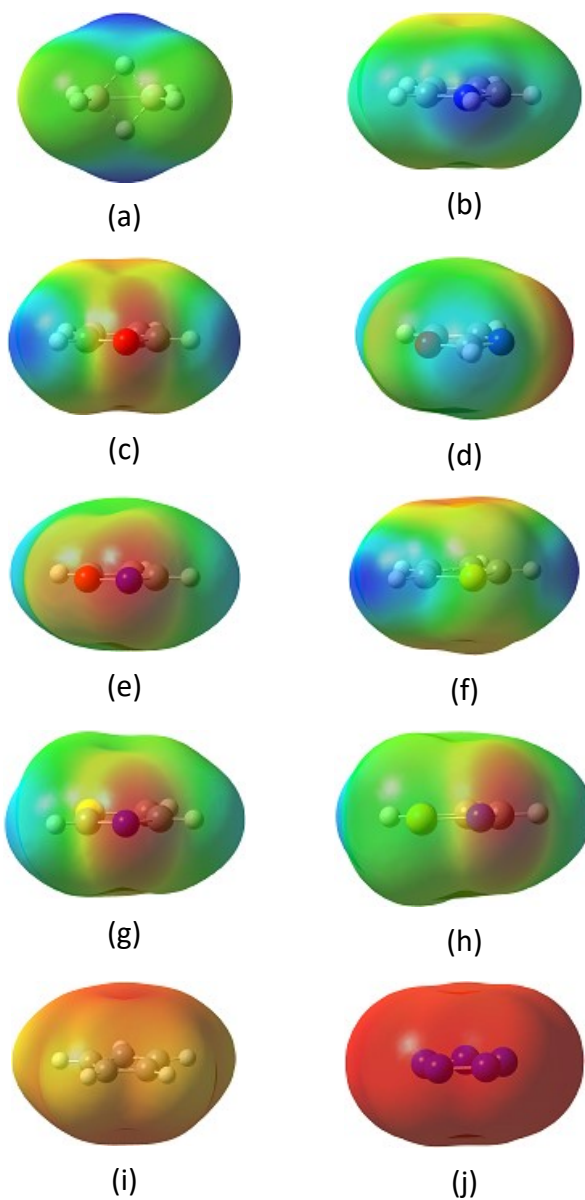

**Supplementary Fig. 1:** MESP surface for (a) DB, (b) Pyr, (c) Fur, (d) Oxa, (e) iOxa, (f) Thio, (g) Thia, (h) iThia, (i) Cp<sup>-</sup> and (j) Pnz<sup>-</sup> obtained at B3LYP-D3/6-311++G(d,p) level of theory

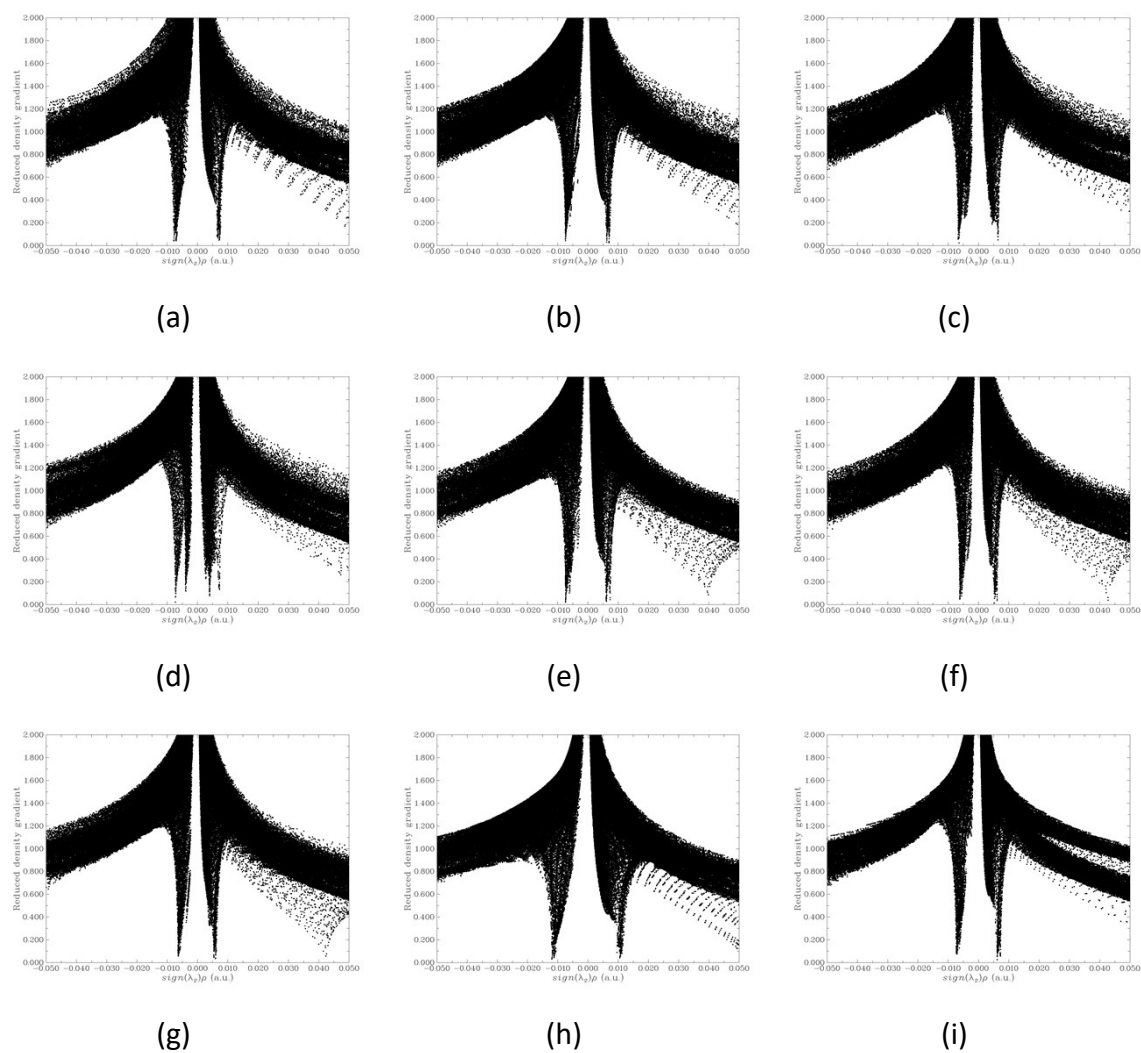

**Supplementary Fig. 2** RDG vs  $\text{sign}(\lambda_2) \rho$  plot for (a) DB...Pyr, (b) DB...Fur, (c) DB...Oxa, (d) DB...iOxa, (e) DB...Thio, (f) DB...Thia, (g) DB...iThia, (h) DB...Cp<sup>-</sup> and (i) DB...Pnz<sup>-</sup> complexes

**Supplementary Table 1:** Electron density ( $\rho$ ), laplacian of electron density ( $\nabla^2\rho$ ), local electronic energy density ( $H(r)$ ) and electron localization function (ELF) values (in a.u.) for the complexes at the bond critical point obtained at B3LYP-D3/6-311++G(d,p) level of theory

| Complexes             | CPs | $\rho$ | $\nabla^2\rho$ | $H(r)$ | ELF    |
|-----------------------|-----|--------|----------------|--------|--------|
| DB...Pyr              | 25  | 0.0078 | 0.0265         | 0.0009 | 0.0237 |
| DB...Fur              | 24  | 0.0075 | 0.0232         | 0.0010 | 0.0286 |
|                       | 33  | 0.0075 | 0.0233         | 0.0010 | 0.0286 |
| DB...Oxa              | 22  | 0.0065 | 0.0207         | 0.0008 | 0.0212 |
|                       | 28  | 0.0067 | 0.0204         | 0.0009 | 0.0256 |
| DB...iOxa             | 25  | 0.0073 | 0.0254         | 0.0008 | 0.0199 |
|                       | 32  | 0.0073 | 0.0244         | 0.0010 | 0.0223 |
| DB...Thio             | 35  | 0.0074 | 0.0229         | 0.0010 | 0.0286 |
|                       | 41  | 0.0074 | 0.0227         | 0.0009 | 0.0279 |
| DB...Thia             | 21  | 0.0056 | 0.0197         | 0.0009 | 0.0159 |
|                       | 30  | 0.0062 | 0.0192         | 0.0008 | 0.0192 |
| DB...iThia            | 21  | 0.0065 | 0.0217         | 0.0010 | 0.0202 |
|                       | 31  | 0.0064 | 0.0207         | 0.0009 | 0.0213 |
| DB...Cp <sup>-</sup>  | 36  | 0.0119 | 0.0359         | 0.0015 | 0.0533 |
|                       | 43  | 0.0112 | 0.0361         | 0.0016 | 0.0451 |
| DB...Pnz <sup>-</sup> | 21  | 0.0073 | 0.0257         | 0.0009 | 0.0206 |
